# Supplementary material for: Single Mo1(W1, Re1) atoms anchored in pyrrolic-N3doped graphene as efficient electrocatalysts for the nitrogen reduction reaction
Source: Royal Society of Chemistry journal article supplement (doi:10.1039/d0ta11144a), 2021-01-01
Supplement: d0ta11144a1.pdf [file d0ta11144a1.pdf]

## Supporting Information

### Single Mo<sub>1</sub> (W<sub>1</sub>, Re<sub>1</sub>) Atoms Anchored in Pyrrolic-N<sub>3</sub> Doped Graphene as Efficient Electrocatalysts for the Nitrogen Reduction Reaction

Wanhui Zhao,<sup>†a</sup> Lanlan Chen,<sup>†a</sup> Wenhua Zhang <sup>\*ab</sup> and Jinlong Yang <sup>\*a</sup>

---

<sup>a</sup> Hefei National Laboratory for Physical Sciences at the Microscale, and Synergetic Innovation Centre of Quantum Information & Quantum Physics, University of Science and Technology of China, Hefei, Anhui 230026, China.

<sup>b</sup> CAS Key Laboratory of Materials for Energy Conversion, University of Science and Technology of China, Hefei, Anhui 230026, China

<sup>†</sup> These authors contributed equally.

\* Corresponding Author

Email: [whhzhang@ustc.edu.cn](mailto:whhzhang@ustc.edu.cn);

[jlyang@ustc.edu.cn](mailto:jlyang@ustc.edu.cn).

## Results and Discussion

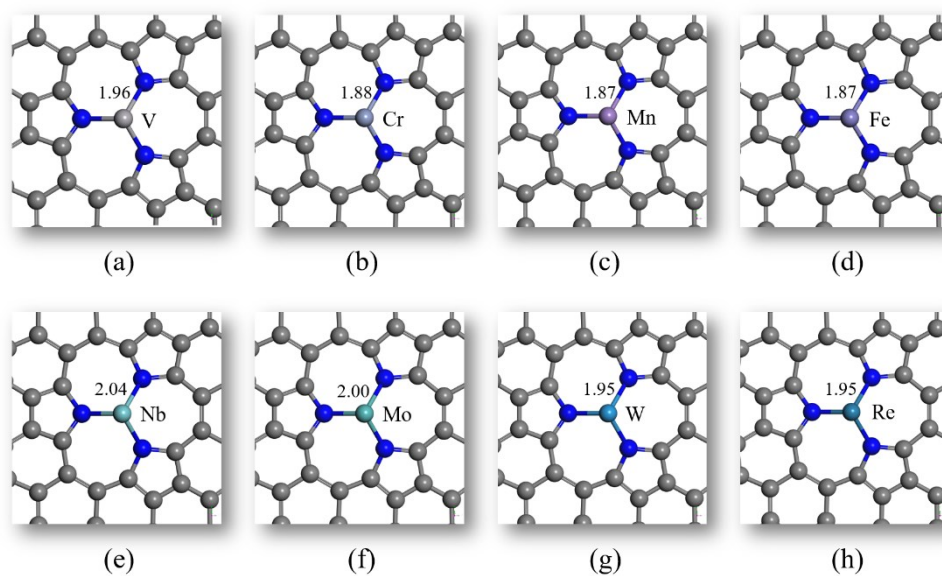

**Fig. S1** From (a) to (h) are the structures of  $V_1$ ,  $Cr_1$ ,  $Mn_1$ ,  $Fe_1$ ,  $Nb_1$ ,  $Mo_1$ ,  $W_1$  and  $Re_1$  anchored at the center of pyrrolic- $N_3$  on graphene. The corresponding bond lengths between metal atoms and the pyrrolic-N are labeled in the adjacent blank. The gray, blue spheres represent carbon and nitrogen atoms, respectively.

**Table S1.** The total binding energies of  $M_1$  atom anchored at the active center of pyrrolic- $N_3$ -G.

| Doped metal | V    | Cr   | Mn   | Fe   | Nb   | Mo   | W    | Re   |
|-------------|------|------|------|------|------|------|------|------|
| $E_b$ (eV)  | 9.99 | 6.92 | 6.49 | 8.07 | 9.14 | 7.26 | 6.09 | 4.29 |

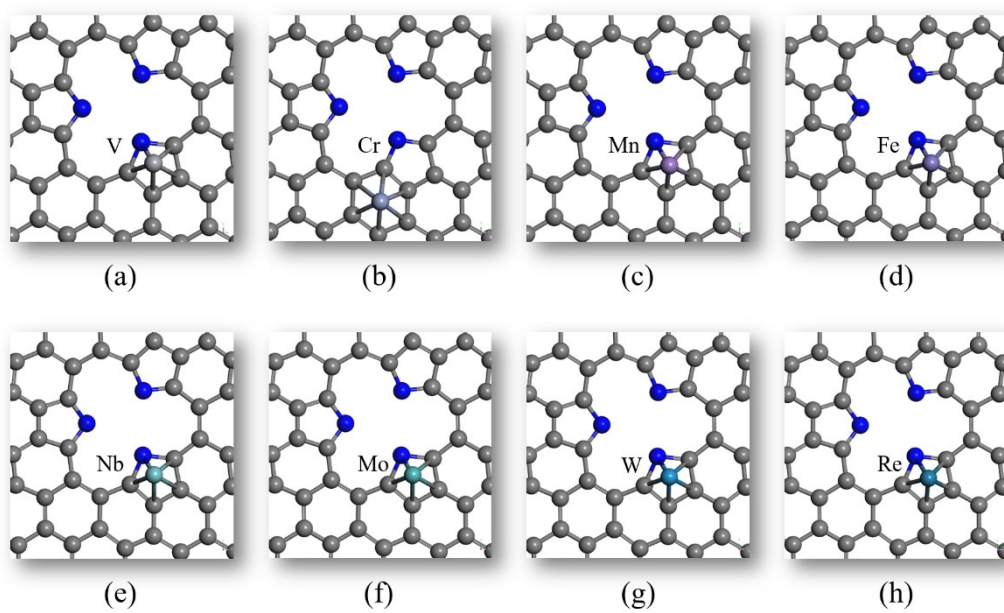

**Fig. S2** From (a) to (h) are the structures of  $V_1$ ,  $Cr_1$ ,  $Mn_1$ ,  $Fe_1$ ,  $Nb_1$ ,  $Mo_1$ ,  $W_1$  and  $Re_1$  anchored at the neighboring carbon sites on graphene. The corresponding metal atoms are labeled in the adjacent blank. The gray, blue spheres represent carbon and nitrogen atoms, respectively.

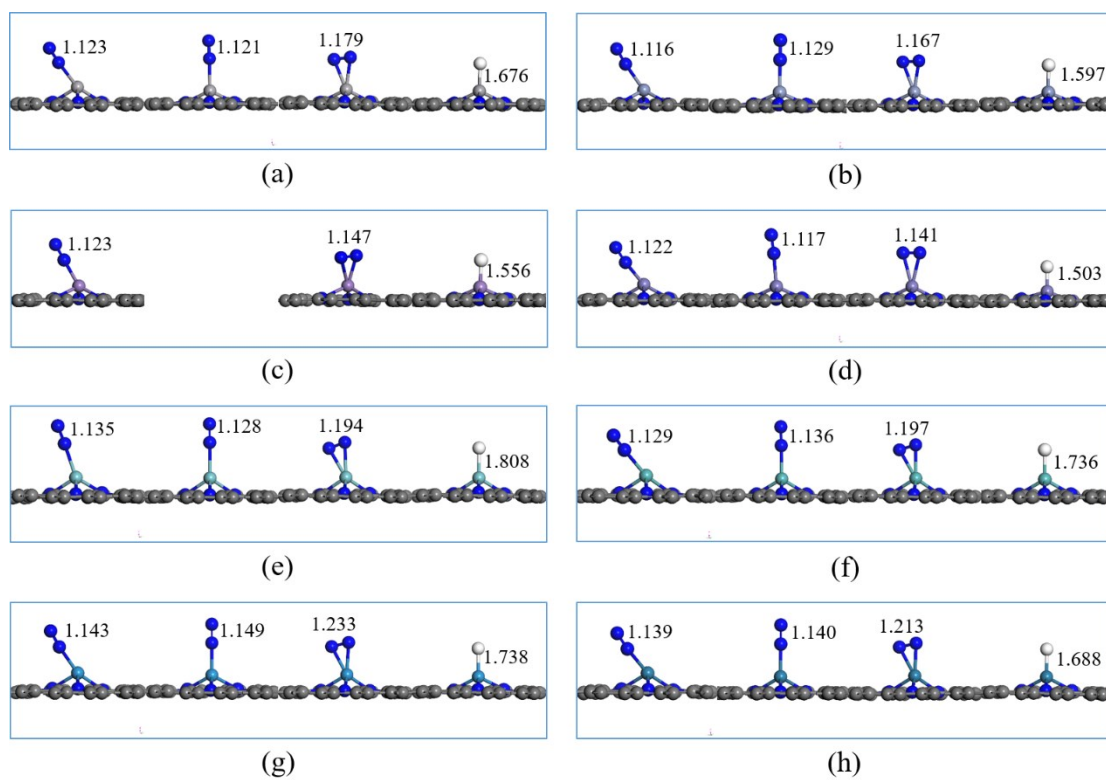

**Fig. S3** From (a) to (h) are the optimized structures of  $N_2$  (end-on and side on modes) and H adsorbed on  $V_1$ ( $Cr_1$ ,  $Mn_1$ ,  $Fe_1$ ,  $Nb_1$ ,  $Mo_1$ ,  $W_1$  and  $Re_1$ )/pyrrolic- $N_3$ -G. The bond lengths of N-N and  $M_1$ -H are marked next to each other. The gray, blue and white spheres represent carbon, nitrogen and hydrogen atoms, respectively.

**Table S2.** The calculated energy differences ( $\Delta E$ ) between inclined and vertical configuration when  $N_2$  adsorbed with end-on mode on each  $M_1$ /pyrrolic- $N_3$ -G.

| Doped metal     | V    | Cr   | Fe   | Nb   | Mo   | W     | Re   |
|-----------------|------|------|------|------|------|-------|------|
| $\Delta E$ (eV) | 0.05 | 0.08 | 0.55 | 0.26 | 0.13 | -0.06 | 0.12 |

**Table S3.** The calculated adsorption Gibbs free energy of atomic hydrogen and nitrogen molecule with end-on and side-on modes on each  $M_1$ /pyrrolic- $N_3$ -G.

| Doped metal                          | V     | Cr    | Mn    | Fe    | Nb    | Mo    | W     | Re    |
|--------------------------------------|-------|-------|-------|-------|-------|-------|-------|-------|
| $\Delta G_H$ (eV)                    | -0.07 | 0.29  | -0.08 | 0.64  | -0.17 | -0.07 | -0.58 | -0.94 |
| $\Delta G_{N_2\text{-end-on}}$ (eV)  | -0.25 | -0.05 | -0.32 | -0.29 | -0.28 | -0.45 | -0.49 | -0.71 |
| $\Delta G_{N_2\text{-side-on}}$ (eV) | 0.25  | 0.46  | 0.21  | 0.66  | -0.10 | -0.22 | -0.63 | -0.38 |

**Table S4.** The reaction Gibbs free energies of the adsorption Gibbs free energies of the second ( $\Delta G_{N_2-N_2}$ ) and third dinitrogen ( $\Delta G_{2N_2-N_2}$ ) molecules combined with the adsorption free energies of hydrogen with the presence of one ( $\Delta G_{N_2-H}$ ) and two dinitrogen ( $\Delta G_{2N_2-H}$ ) on each  $M_1$ /pyrrolic- $N_3$ -G.

| Doped metal               | V     | Cr    | Mn    | Fe    | Nb    | Mo    | W     | Re    |
|---------------------------|-------|-------|-------|-------|-------|-------|-------|-------|
| Numbers of adsorbed $N_2$ | 3     | 2     | 3     | 3     | 3     | 3     | 3     | 3     |
| $\Delta G_{N_2-H}$ (eV)   | 0.43  | 0.84  | 0.42  | 0.75  | 0.23  | 0.22  | -0.17 | -0.51 |
| $\Delta G_{2N_2}$ (eV)    | -0.12 | -0.09 | -0.21 | -0.17 | -0.18 | -0.32 | -0.25 | -0.53 |
| $\Delta G_{2N_2-H}$ (eV)  | 0.73  | 1.14  | 0.59  | 0.56  | 0.40  | 0.57  | 0.22  | 0.12  |
| $\Delta G_{3N_2}$ (eV)    | -0.10 | 0.01  | -0.18 | -0.17 | -0.18 | -0.16 | -0.17 | -0.51 |



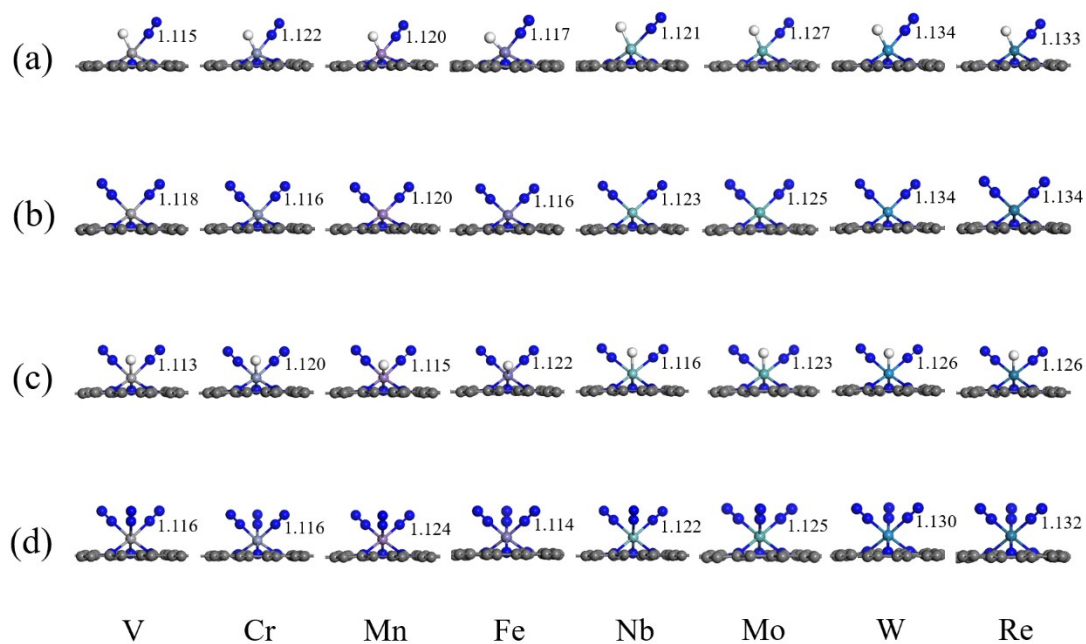

**Fig. S4** The optimized structures of side view with corresponding bond length of N-N. (a) optimized structures of  $*N_2-H$ . (b) optimized structures of  $*2N_2$ . (c) optimized structures of  $*2N_2-H$ . (d) optimized structures of  $*3N_2$ . The \* represent the substrate of  $V_1(Cr_1, Mn_1, Fe_1, Nb_1, Mo_1, W_1$  and  $Re_1)/pyrrolic-N_3-G$ . The gray, blue and white spheres represent carbon, nitrogen and hydrogen atoms, respectively.

**Table S5.** The calculated adsorption energy of N<sub>2</sub> ( $\Delta E_{N_2}$ ) and H<sub>2</sub>O with the effect of hydrogen bond ( $E_{ad}^b$ ) on M<sub>1</sub>/pyrrolic-N<sub>3</sub>-G, where the M<sub>1</sub> represents the single transition metal.

| Species                                     | $E_{ad}^b$ (eV) | $\Delta E_{N_2}$ (eV) |
|---------------------------------------------|-----------------|-----------------------|
| V <sub>1</sub> /pyrrolic-N <sub>3</sub> -G  | -0.48           | -0.74                 |
| Cr <sub>1</sub> /pyrrolic-N <sub>3</sub> -G | -0.35           | -0.56                 |
| Mn <sub>1</sub> /pyrrolic-N <sub>3</sub> -G | -0.50           | -0.81                 |
| Fe <sub>1</sub> /pyrrolic-N <sub>3</sub> -G | -0.43           | -0.81                 |
| Nb <sub>1</sub> /pyrrolic-N <sub>3</sub> -G | -0.31           | -0.66                 |
| Mo <sub>1</sub> /pyrrolic-N <sub>3</sub> -G | -0.35           | -0.82                 |
| W <sub>1</sub> /pyrrolic-N <sub>3</sub> -G  | -0.50           | -1.09                 |
| Re <sub>1</sub> /pyrrolic-N <sub>3</sub> -G | -0.67           | -1.31                 |

**Table S6.** The numbers of nitrogen molecules effectively binding on  $M_1/\text{pyrrolic-N}_3\text{-G}$ , the reaction Gibbs free energy (eV) of the formation of  $*2\text{N}_2\text{-NNH}$  ( $\Delta G_{*\text{NNH}}$ ), the adsorption free energy of  $*3\text{N}_2\text{-H}$  ( $\Delta G_{\text{M-H}}$ ) and the potential difference ( $\Delta U$ ) between the formation of  $*2\text{N}_2\text{-NNH}$  and  $*3\text{N}_2\text{-H}$  ( $\Delta U = U_{*\text{NNH}} - U_{\text{M-H}} = -\Delta G_{*\text{NNH}}/e - [-\Delta G_{\text{M-H}}/e]$ ).

| Doped metal              | V    | Cr   | Mn    | Fe    | Nb    | Mo   | W    | Re   |
|--------------------------|------|------|-------|-------|-------|------|------|------|
| number                   | 3    | 2    | 3     | 3     | 3     | 3    | 3    | 3    |
| $\Delta G_{*\text{NNH}}$ | 1.22 | 1.13 | 1.01  | 1.76  | 0.77  | 0.49 | 0.33 | 0.51 |
| $\Delta G_{\text{M-H}}$  | 1.46 | 1.14 | 0.74  | 0.96  | 0.69  | 0.68 | 0.57 | 0.97 |
| $\Delta U$ (V)           | 0.24 | 0.01 | -0.27 | -0.80 | -0.08 | 0.19 | 0.24 | 0.46 |

**Table S7.** Reaction Gibbs free energy (eV) of each elementary step of NRR on 3N<sub>2</sub>-Mo<sub>1</sub>/pyrrolic-N<sub>3</sub>-G via distal, alternating and hybrid mechanisms with two speculator dinitrogen molecules. Here the \* represents the substrate of 2N<sub>2</sub>-Mo<sub>1</sub>/pyrrolic-N<sub>3</sub>-G.

|             |      |                   |                     |                                  |                                  |                  |                 |
|-------------|------|-------------------|---------------------|----------------------------------|----------------------------------|------------------|-----------------|
| Distal      | *NNH | *NNH <sub>2</sub> | *N                  | *NH                              | *NH <sub>2</sub>                 | *NH <sub>3</sub> | NH <sub>3</sub> |
| ΔG (eV)     | 0.49 | -0.55             | 0.41                | -1.12                            | -0.20                            | -0.71            | 0.73            |
| Alternating | *NNH | *NHHH             | *NHHNH <sub>2</sub> | *NH <sub>2</sub> NH <sub>2</sub> | *NH <sub>2</sub> NH <sub>3</sub> | *NH <sub>3</sub> | NH <sub>3</sub> |
| ΔG (eV)     | 0.49 | 0.53              | -0.58               | -0.12                            | -1.10                            | -0.90            | 0.73            |
| Hybrid      | *NNH | *NNH <sub>2</sub> | *NHHNH <sub>2</sub> | *NH <sub>2</sub> NH <sub>2</sub> | *NH <sub>2</sub> NH <sub>3</sub> | *NH <sub>3</sub> | NH <sub>3</sub> |
| ΔG (eV)     | 0.49 | -0.55             | 0.50                | -0.12                            | -1.10                            | -0.90            | 0.73            |

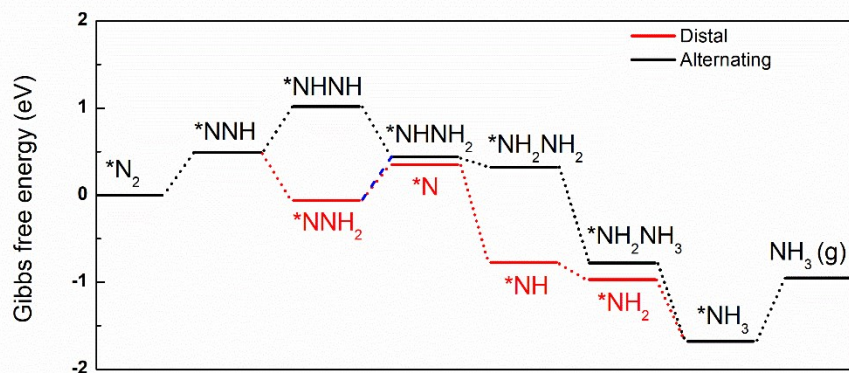

**Fig. S5** The calculated Gibbs free energy diagram of the two paths (Distal and Alternating) of NRR for  $3N_2$ - $Mo_1$ /pyrrolic- $N_3$ -G. The dotted blue line represents the hybrid path, here the \* represents the substrate of  $2N_2$ - $Mo_1$ /pyrrolic- $N_3$ -G.

**Table S8.** Reaction Gibbs free energy (eV) of each elementary step of NRR on 3N<sub>2</sub>-W<sub>1</sub>/pyrrolic-N<sub>3</sub>-G via distal, alternating and hybrid mechanisms with two spectator dinitrogen molecules. Here the \* represents the substrate of 2N<sub>2</sub>-W<sub>1</sub>/pyrrolic-N<sub>3</sub>-G.

|             |      |                   |                     |                                  |                                  |                  |                 |
|-------------|------|-------------------|---------------------|----------------------------------|----------------------------------|------------------|-----------------|
| Distal      | *NNH | *NNH <sub>2</sub> | *N                  | *NH                              | *NH <sub>2</sub>                 | *NH <sub>3</sub> | NH <sub>3</sub> |
| ΔG (eV)     | 0.33 | -0.68             | 0.33                | -1.28                            | 0.03                             | -0.39            | 0.70            |
| Alternating | *NNH | *NHHH             | *NHHNH <sub>2</sub> | *NH <sub>2</sub> NH <sub>2</sub> | *NH <sub>2</sub> NH <sub>3</sub> | *NH <sub>3</sub> | NH <sub>3</sub> |
| ΔG (eV)     | 0.33 | 0.61              | -0.59               | 0.10                             | -1.50                            | -0.61            | 0.70            |
| Hybrid      | *NNH | *NNH <sub>2</sub> | *NHHNH <sub>2</sub> | *NH <sub>2</sub> NH <sub>2</sub> | *NH <sub>2</sub> NH <sub>3</sub> | *NH <sub>3</sub> | NH <sub>3</sub> |
| ΔG (eV)     | 0.33 | -0.68             | 0.70                | 0.10                             | -1.50                            | -0.61            | 0.70            |

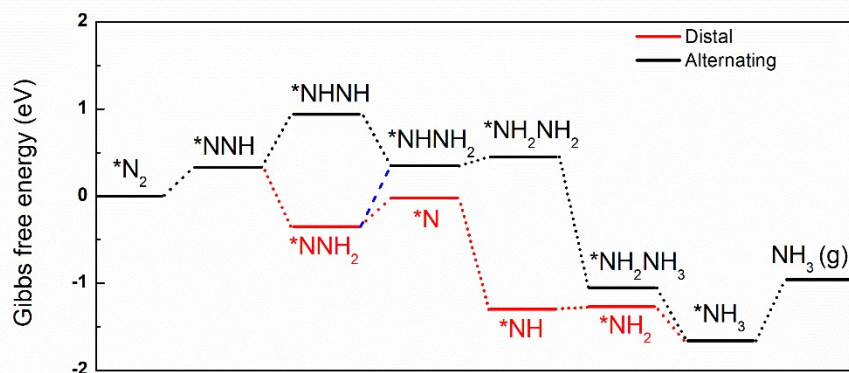

**Fig. S6** The calculated Gibbs free energy diagram of the two paths (Distal and Alternating) of NRR for  $3N_2$ - $W_1$ /pyrrolic- $N_3$ -G. The dotted blue line represents the hybrid path, here the \* represents the substrate of  $2N_2$ - $W_1$ /pyrrolic- $N_3$ -G.

**Table S9.** Reaction Gibbs free energy (eV) of each elementary step of NRR on 3N<sub>2</sub>-Re<sub>1</sub>/pyrrolic-N<sub>3</sub>-G via distal, alternating and hybrid mechanisms with two spectator dinitrogen molecules. Here the \* represents the substrate of 2N<sub>2</sub>-Re<sub>1</sub>/pyrrolic-N<sub>3</sub>-G.

|             |      |                   |                     |                                  |                                  |                  |                 |
|-------------|------|-------------------|---------------------|----------------------------------|----------------------------------|------------------|-----------------|
| Distal      | *NNH | *NNH <sub>2</sub> | *N                  | *NH                              | *NH <sub>2</sub>                 | *NH <sub>3</sub> | NH <sub>3</sub> |
| ΔG (eV)     | 0.51 | 0.37              | -0.49               | -0.03                            | -1.23                            | -0.51            | 0.42            |
| Alternating | *NNH | *NHHH             | *NHHNH <sub>2</sub> | *NH <sub>2</sub> NH <sub>2</sub> | *NH <sub>2</sub> NH <sub>3</sub> | *NH <sub>3</sub> | NH <sub>3</sub> |
| ΔG (eV)     | 0.51 | 0.81              | -0.95               | 0.36                             | -1.32                            | -0.79            | 0.42            |
| Hybrid      | *NNH | *NNH <sub>2</sub> | *NHHNH <sub>2</sub> | *NH <sub>2</sub> NH <sub>2</sub> | *NH <sub>2</sub> NH <sub>3</sub> | *NH <sub>3</sub> | NH <sub>3</sub> |
| ΔG (eV)     | 0.51 | 0.37              | -0.51               | 0.36                             | -1.32                            | -0.79            | 0.42            |



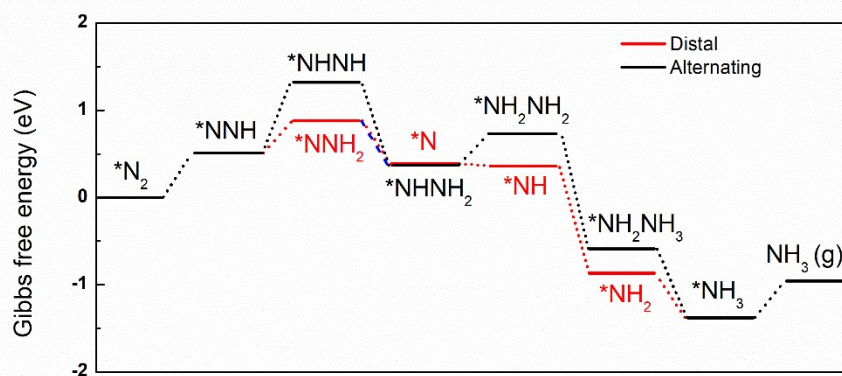

**Fig. S7** The calculated Gibbs free energy diagram of the two paths (Distal and Alternating) of NRR for  $3N_2$ - $Re_1$ /pyrrolic- $N_3$ -G. The dotted blue line represents the hybrid path, here the \* represents the substrate of  $2N_2$ - $Re_1$ /pyrrolic- $N_3$ -G.

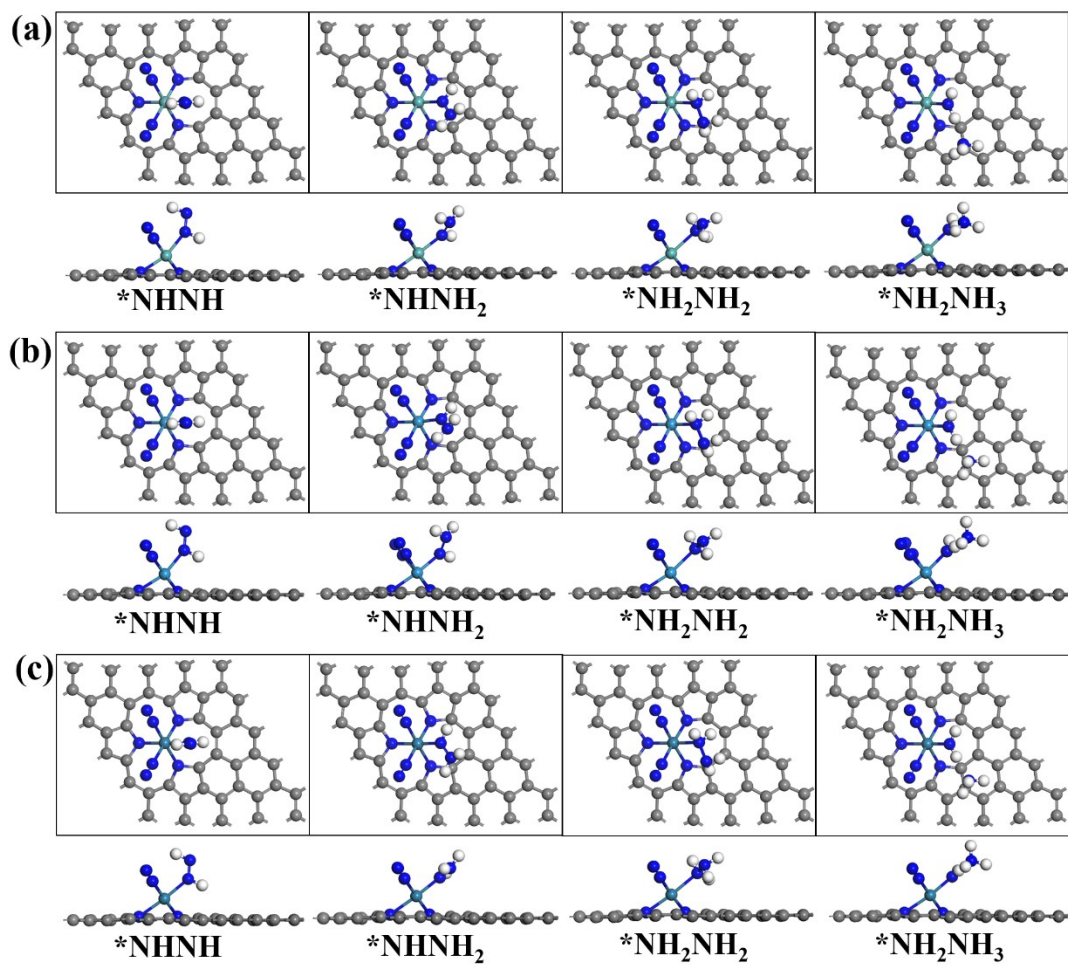

**Fig. S8** The optimized intermediate configurations of NHHH, NHHH<sub>2</sub>, NH<sub>2</sub>NH<sub>2</sub> (N<sub>2</sub>H<sub>4</sub>) and NH<sub>2</sub>NH<sub>3</sub> adsorbed on 2N<sub>2</sub>-Mo<sub>1</sub>/pyrrolic-N<sub>3</sub>-G (a), 2N<sub>2</sub>-W<sub>1</sub>/pyrrolic-N<sub>3</sub>-G (b) and 2N<sub>2</sub>-Re<sub>1</sub>/pyrrolic-N<sub>3</sub>-G (c) with top and side view, where the \* represents the substrate of 2N<sub>2</sub>-M<sub>1</sub>/pyrrolic-N<sub>3</sub>-G.

**Table S10.** The calculated spin moments of 3N<sub>2</sub>-M<sub>1</sub>/pyrrolic-N<sub>3</sub>-G. (M<sub>1</sub>=V, Cr, Mn, Fe, Nb, Mo, W and Re)

| Spin moments ( $\mu\text{B}$ )              | metal | total | N-N          | N-N          | N-N          |
|---------------------------------------------|-------|-------|--------------|--------------|--------------|
| V <sub>1</sub> /pyrrolic-N <sub>3</sub> -G  | 2.10  | 2.79  | -0.012/0.110 | -0.012/0.111 | -0.012/0.110 |
| Cr <sub>1</sub> /pyrrolic-N <sub>3</sub> -G | 2.18  | 2.55  | -0.026/0.030 | -0.026/0.029 | none         |
| Mn <sub>1</sub> /pyrrolic-N <sub>3</sub> -G | 0.21  | 0.23  | -0.005/0.001 | -0.005/0.001 | -0.005/0.001 |
| Fe <sub>1</sub> /pyrrolic-N <sub>3</sub> -G | 0.00  | 0.00  | 0.000/0.000  | 0.000/0.000  | 0.000/0.000  |
| Nb <sub>1</sub> /pyrrolic-N <sub>3</sub> -G | 1.26  | 2.64  | -0.009/0.168 | -0.009/0.168 | -0.009/0.167 |
| Mo <sub>1</sub> /pyrrolic-N <sub>3</sub> -G | 1.08  | 1.81  | -0.020/0.087 | -0.020/0.087 | -0.020/0.087 |
| W <sub>1</sub> /pyrrolic-N <sub>3</sub> -G  | 0.96  | 1.90  | -0.020/0.125 | -0.020/0.125 | -0.020/0.125 |
| Re <sub>1</sub> /pyrrolic-N <sub>3</sub> -G | 0.11  | 0.21  | -0.003/0.013 | -0.003/0.013 | -0.003/0.013 |

**Table S11.** Reaction Gibbs free energy (eV) of each elementary step of NRR on 3N<sub>2</sub>-W<sub>1</sub>/pyridine-N<sub>3</sub>-G via distal, alternating and hybrid mechanisms with two spectator dinitrogen molecules. Here the \* represents the substrate of 2N<sub>2</sub>-W<sub>1</sub>/pyridine-N<sub>3</sub>-G.

|             |      |                   |                    |                                  |                                  |                  |                 |                    |
|-------------|------|-------------------|--------------------|----------------------------------|----------------------------------|------------------|-----------------|--------------------|
| Distal      | *NNH | *NNH <sub>2</sub> | *N                 | *NH                              | *NH <sub>2</sub>                 | *NH <sub>3</sub> | NH <sub>3</sub> | *N <sub>2</sub> -H |
| ΔG (eV)     | 0.34 | -0.09             | -0.45              | -0.45                            | -0.22                            | -0.20            | 0.12            | 0.43               |
| Alternating | *NNH | *NHNH             | *NHNH <sub>2</sub> | *NH <sub>2</sub> NH <sub>2</sub> | *NH <sub>2</sub> NH <sub>3</sub> | *NH <sub>3</sub> | NH <sub>3</sub> |                    |
| ΔG (eV)     | 0.34 | 0.99              | -0.70              | 0.38                             | -1.71                            | -0.40            | 0.12            |                    |
| Hybrid      | *NNH | *NNH <sub>2</sub> | *NHNH <sub>2</sub> | *NH <sub>2</sub> NH <sub>2</sub> | *NH <sub>2</sub> NH <sub>3</sub> | *NH <sub>3</sub> | NH <sub>3</sub> | ΔU                 |
| ΔG (eV)     | 0.34 | -0.09             | 0.42               | 0.38                             | -1.71                            | -0.40            | 0.12            | 0.09 (V)           |

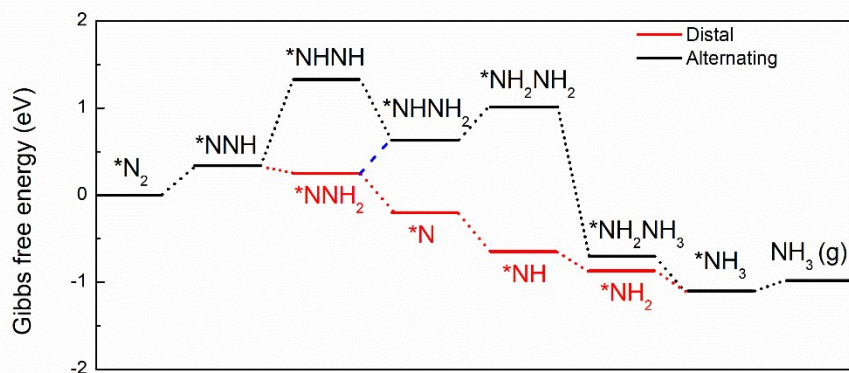

**Fig. S9** The calculated Gibbs free energy diagram of the two paths (Distal and Alternating) of NRR for  $3N_2$ - $W_1$ /pyridine- $N_3$ -G. The dotted blue line represents the hybrid path, here the \* represents the substrate of  $2N_2$ - $W_1$ /pyridine- $N_3$ -G.

**Table S12.** The calculated reaction free energy of key intermediates on Mo<sub>1</sub>(W<sub>1</sub>, Re<sub>1</sub>)/pyrrolic-N<sub>3</sub>-G by using the functional methods of PW91 and RPBE as the benchmark compared with PBE.

| Species                 | Mo <sub>1</sub> /pyrrolic-N <sub>3</sub> -G (ΔG, eV) |       |       | W <sub>1</sub> /pyrrolic-N <sub>3</sub> -G (ΔG, eV) |       |       | Re <sub>1</sub> /pyrrolic-N <sub>3</sub> -G (ΔG, eV) |       |       |
|-------------------------|------------------------------------------------------|-------|-------|-----------------------------------------------------|-------|-------|------------------------------------------------------|-------|-------|
|                         | PBE                                                  | PW91  | RPBE  | PBE                                                 | PW91  | RPBE  | PBE                                                  | PW91  | RPBE  |
| *H                      | -0.07                                                | -0.05 | -0.05 | -0.58                                               | -0.67 | -0.43 | -0.94                                                | -0.97 | -0.84 |
| *2H                     | 0.10                                                 | 0.14  | 0.45  | 0.13                                                | -0.09 | -0.06 | 0.56                                                 | 0.53  | 0.46  |
| *N <sub>2</sub> _end-on | -0.45                                                | -0.38 | -0.41 | -0.49                                               | -0.63 | -0.46 | -0.71                                                | -0.84 | -0.78 |
| *N <sub>2</sub> -H      | 0.22                                                 | 0.24  | 0.43  | -0.17                                               | -0.27 | -0.36 | -0.51                                                | -0.47 | -0.47 |
| *2N <sub>2</sub>        | -0.32                                                | -0.27 | -0.22 | -0.25                                               | -0.38 | -0.53 | -0.53                                                | -0.67 | -0.71 |
| *2N <sub>2</sub> -H     | 0.57                                                 | 0.61  | 0.50  | 0.22                                                | 0.12  | 0.05  | 0.12                                                 | 0.07  | 0.01  |
| *3N <sub>2</sub>        | -0.16                                                | -0.11 | -0.23 | -0.17                                               | -0.39 | -0.49 | -0.51                                                | -0.69 | -0.67 |
| *3N <sub>2</sub> -H     | 0.68                                                 | 0.66  | 0.47  | 0.57                                                | 0.51  | 0.34  | 0.97                                                 | 0.92  | 0.60  |
| *2N <sub>2</sub> -NNH   | 0.49                                                 | 0.46  | 0.46  | 0.33                                                | 0.28  | 0.31  | 0.51                                                 | 0.49  | 0.47  |

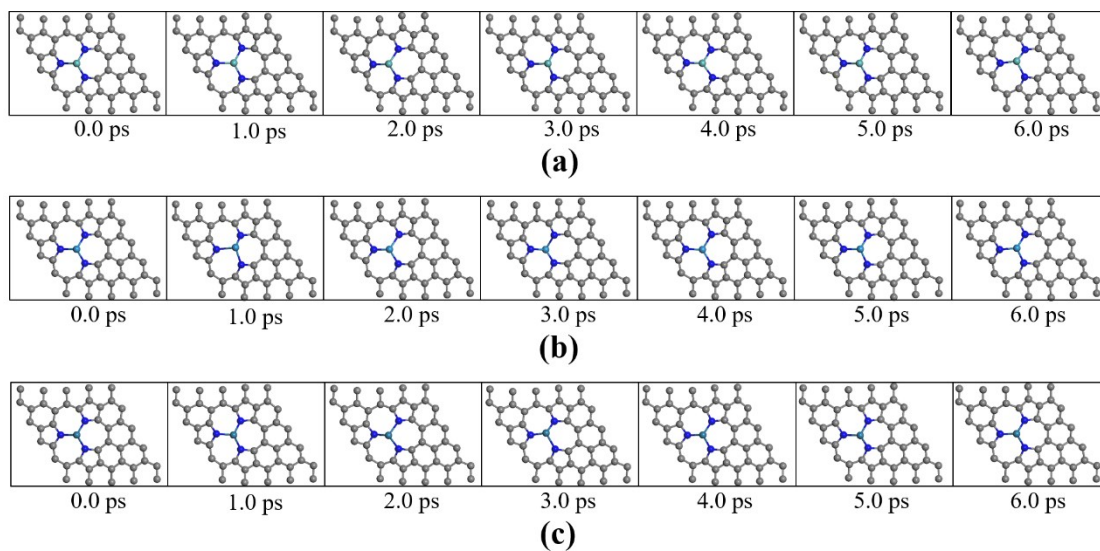

**Fig. S10** The calculated AIMD simulations to investigate the stability of Mo<sub>1</sub>/pyrrolic-N<sub>3</sub>-G (a), W<sub>1</sub>/pyrrolic-N<sub>3</sub>-G (b) and Re<sub>1</sub>/pyrrolic-N<sub>3</sub>-G (c) at 400 K by seven sets of snapshots for 6 ps.

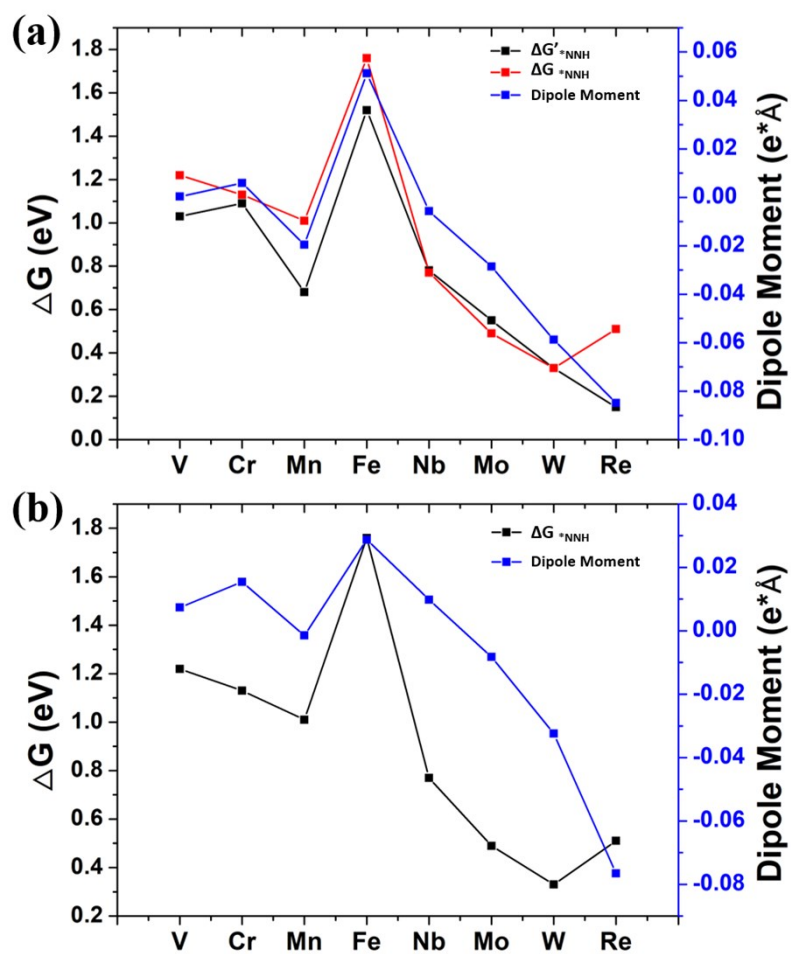

**Fig. S11** (a) The relationship between the dipole moments of one adsorbed  $N_2$  and  $\Delta G'_{*NNH}$ ,  $\Delta G_{*NNH}$ . (b) The relationship between the dipole moments of one of the multi-adsorbed  $N_2$  and the corresponding  $\Delta G_{*NNH}$ , where the  $\Delta G'_{*NNH}$  represents the free energy of  $*N_2$  hydrogenation to  $*NNH$  and the  $\Delta G_{*NNH}$  represents the free energy of  $*3N_2$  hydrogenation to  $*2N_2-NNH$ .



**Table S13.** The atomic charges of supported metals ( $Q_{TM}$ ) before reaction, the charges accumulated on \*H ( $Q_H$ ) after atomic H adsorbed on the metals with pre-covered multiple  $N_2$ , valence electrons ( $V_{TM}$ ), electronegativity ( $\chi$ ), atomic radius (AR) and electron affinity (EA) of the transition metals.

| Coordination | Metal | $Q_{TM}$ | $Q_H$   | $V_{TM}$ | $\chi$ | AR  | EA   |
|--------------|-------|----------|---------|----------|--------|-----|------|
| Pyrrolic-N   | V     | 0.5352   | -0.0399 | 5        | 1.63   | 171 | 0.53 |
|              | Cr    | 0.7039   | -0.0801 | 6        | 1.66   | 166 | 0.68 |
|              | Mn    | 0.3998   | 0.1115  | 7        | 1.55   | 161 | 0.00 |
|              | Fe    | 0.3293   | -0.1171 | 8        | 1.83   | 156 | 0.16 |
|              | Nb    | 0.9214   | -0.1058 | 5        | 1.59   | 198 | 0.90 |
|              | Mo    | 0.7446   | -0.0421 | 6        | 2.16   | 190 | 0.75 |
|              | W     | 0.5962   | -0.0400 | 6        | 2.36   | 193 | 0.82 |
|              | Re    | 0.4769   | 0.0124  | 7        | 2.93   | 188 | 0.16 |
| Pyridine-N   | V     | 0.5814   | -0.2321 | 5        | 1.63   | 171 | 0.53 |
|              | Cr    | 0.6506   | -0.0222 | 6        | 1.66   | 166 | 0.68 |
|              | Mn    | 0.3279   | 0.1292  | 7        | 1.55   | 161 | 0.00 |
|              | Fe    | 0.3383   | -0.1324 | 8        | 1.83   | 156 | 0.16 |
|              | Nb    | 0.8784   | -0.1446 | 5        | 1.59   | 198 | 0.90 |
|              | Mo    | 0.6544   | -0.0766 | 6        | 2.16   | 190 | 0.75 |
|              | W     | 0.5141   | -0.0692 | 6        | 2.36   | 193 | 0.82 |
|              | Re    | 0.3951   | 0.0023  | 7        | 2.93   | 188 | 0.16 |

**Table S14.** The calculated  $\Delta G_{*NNH\_DFT}$ ,  $\Delta U_{DFT}$  and predicted  $\Delta G_{*NNH\_SISSO}$ ,  $\Delta U_{SISSO}$  of  $V_1(Cr_1, Mn_1, Fe_1, Nb_1, Mo_1, W_1, Re_1)/pyrrolic-N_3-G$  and  $V_1(Cr_1, Mn_1, Fe_1, Nb_1, Mo_1, W_1, Re_1)/pyridine-N_3-G$ . ( $\Delta U = \Delta G_{*M1-H} - \Delta G_{*NNH}$ )

|                       | $\Delta G_{*NNH\_DFT}$ | $\Delta G_{*NNH\_SISSO}$ | $\Delta U_{DFT}$ | $\Delta U_{SISSO}$ |
|-----------------------|------------------------|--------------------------|------------------|--------------------|
| $V_1/pyrrolic-N_3-G$  | 1.22                   | 1.23                     | 0.24             | 0.25               |
| $Cr_1/pyrrolic-N_3-G$ | 1.13                   | 0.93                     | 0.01             | 0.03               |
| $Mn_1/pyrrolic-N_3-G$ | 1.01                   | 1.02                     | -0.27            | -0.27              |
| $Fe_1/pyrrolic-N_3-G$ | 1.76                   | 1.73                     | -0.80            | -0.84              |
| $Nb_1/pyrrolic-N_3-G$ | 0.77                   | 0.87                     | -0.08            | -0.05              |
| $Mo_1/pyrrolic-N_3-G$ | 0.49                   | 0.41                     | 0.19             | 0.23               |
| $W_1/pyrrolic-N_3-G$  | 0.33                   | 0.38                     | 0.24             | 0.27               |
| $Re_1/pyrrolic-N_3-G$ | 0.51                   | 0.47                     | 0.46             | 0.40               |
| $V_1/pyridine-N_3-G$  | 0.89                   | 0.94                     | -0.63            | -0.68              |
| $Cr_1/pyridine-N_3-G$ | 0.75                   | 0.78                     | 0.35             | 0.33               |
| $Mn_1/pyridine-N_3-G$ | 1.75                   | 1.78                     | -0.33            | -0.35              |
| $Fe_1/pyridine-N_3-G$ | 1.46                   | 1.51                     | -1.31            | -1.24              |
| $Nb_1/pyridine-N_3-G$ | 0.43                   | 0.53                     | -0.26            | -0.30              |
| $Mo_1/pyridine-N_3-G$ | 0.50                   | 0.55                     | -0.01            | -0.05              |
| $W_1/pyridine-N_3-G$  | 0.34                   | 0.29                     | 0.09             | 0.09               |
| $Re_1/pyridine-N_3-G$ | 1.38                   | 1.31                     | 0.39             | 0.43               |

**Table S15.** The calculated  $\Delta G^*_{\text{NNH\_DFT}}$ ,  $\Delta U_{\text{DFT}}$  and predicted  $\Delta G^*_{\text{NNH\_SISSO}}$ ,  $\Delta U_{\text{SISSO}}$  on Nb<sub>1</sub>/gt-C<sub>3</sub>N<sub>4</sub>.

|                                                   | $\Delta G^*_{\text{NNH\_DFT}}$ | $\Delta G^*_{\text{NNH\_SISSO}}$ | $\Delta U_{\text{DFT}}$ | $\Delta U_{\text{SISSO}}$ |
|---------------------------------------------------|--------------------------------|----------------------------------|-------------------------|---------------------------|
| Nb <sub>1</sub> /gt-C <sub>3</sub> N <sub>4</sub> | 0.51                           | 0.40                             | -0.09                   | -0.24                     |
